# Supplementary material for: Four 3d–4f heterometallic Ln45M7 clusters protected by mixed ligands
Source: Royal Society of Chemistry journal article supplement (doi:10.1039/c8ce00173a), 2018-01-01
Supplement: c8ce00173a1.pdf [file c8ce00173a1.pdf]

## Supporting Information

### Four 3d-4f Heterometallic Ln<sub>45</sub>M<sub>7</sub> Clusters Protected with Mixed Ligands

Shen Fan, Su-Hui Xu, Xiu-Ying Zheng, Zhi-Hao Yan, Xiang-Jian Kong,\* La-Sheng Long\* and Lan-Sun Zheng

*Collaborative Innovation Center of Chemistry for Energy Materials, State Key Laboratory of Physical Chemistry of Solid Surface and Department of Chemistry, College of Chemistry and Chemical Engineering, Xiamen University, Xiamen, 361005, China.*

E-mail: [xjkong@xmu.edu.cn](mailto:xjkong@xmu.edu.cn), [lslong@xmu.edu.cn](mailto:lslong@xmu.edu.cn).

**Table S1.** Crystal data and details of data collection and refinement for complexes 1–4

| Complex                                 | <b>Gd<sub>45</sub>Co<sub>7</sub> (1)</b>                                             | <b>Gd<sub>45</sub>Ni<sub>7</sub> (2)</b>                                             | <b>Dy<sub>45</sub>Co<sub>7</sub> (3)</b>                                             | <b>Dy<sub>45</sub>Ni<sub>7</sub> (4)</b>                                             |
|-----------------------------------------|--------------------------------------------------------------------------------------|--------------------------------------------------------------------------------------|--------------------------------------------------------------------------------------|--------------------------------------------------------------------------------------|
| formula                                 | C <sub>82</sub> H <sub>416</sub> Cl <sub>25</sub> Co <sub>7</sub> Gd <sub>45</sub> O | C <sub>82</sub> H <sub>416</sub> Cl <sub>25</sub> Ni <sub>7</sub> Gd <sub>45</sub> O | C <sub>82</sub> H <sub>416</sub> Cl <sub>25</sub> Co <sub>7</sub> Dy <sub>45</sub> O | C <sub>82</sub> H <sub>416</sub> Cl <sub>25</sub> Dy <sub>45</sub> Ni <sub>7</sub> O |
|                                         | 388                                                                                  | 388                                                                                  | 388                                                                                  | 388                                                                                  |
| FW                                      | 15987.13                                                                             | 15985.59                                                                             | 16223.38                                                                             | 16221.84                                                                             |
| Temperature/<br>K                       | 133(2)                                                                               | 173(2)                                                                               | 173(2)                                                                               | 100(2)                                                                               |
| Crystal system                          | monoclinic                                                                           | monoclinic                                                                           | monoclinic                                                                           | monoclinic                                                                           |
| Space group                             | <i>P2<sub>1</sub>/n</i>                                                              | <i>P2<sub>1</sub>/n</i>                                                              | <i>P2<sub>1</sub>/n</i>                                                              | <i>P2<sub>1</sub>/n</i>                                                              |
| a /Å                                    | 31.5773(5)                                                                           | 31.6894(10)                                                                          | 31.4199(9)                                                                           | 31.3304(13)                                                                          |
| b /Å                                    | 36.4648(5)                                                                           | 36.6432(15)                                                                          | 36.1969(8)                                                                           | 35.9748(10)                                                                          |
| c /Å                                    | 38.7297(9)                                                                           | 39.6432(15)                                                                          | 39.2591(13)                                                                          | 39.1007(15)                                                                          |
| β/°                                     | 107.410(2)                                                                           | 107.229(3)                                                                           | 107.313(3)                                                                           | 107.174(4)                                                                           |
| V/Å <sup>3</sup>                        | 42552.7                                                                              | 43798(3)                                                                             | 42627(2)                                                                             | 42106(3)                                                                             |
| Z                                       | 4                                                                                    | 4                                                                                    | 4                                                                                    | 4                                                                                    |
| Dc/g cm <sup>-3</sup>                   | 2.495                                                                                | 2.424                                                                                | 2.528                                                                                | 2.559                                                                                |
| μ/mm <sup>-1</sup>                      | 7.448                                                                                | 7.272                                                                                | 8.322                                                                                | 8.462                                                                                |
| Data/paramete                           | 74720/3557                                                                           | 76952/3449                                                                           | 74915/3566                                                                           | 73949/3547                                                                           |
| rs                                      |                                                                                      |                                                                                      |                                                                                      |                                                                                      |
| θ/°                                     | 3.336 – 25.00                                                                        | 2.96 – 25.00                                                                         | 2.866 – 25.00                                                                        | 3.321 – 25.00                                                                        |
| Observed<br>reflections                 | 204461                                                                               | 187030                                                                               | 192701                                                                               | 251651                                                                               |
| F (000)                                 | 30024.0                                                                              | 30052.0                                                                              | 30384.0                                                                              | 30412.0                                                                              |
| GOF                                     | 1.031                                                                                | 1.053                                                                                | 1.023                                                                                | 0.971                                                                                |
| R <sub>1</sub> [I > 2σ(I)] <sup>a</sup> | 0.0835                                                                               | 0.1240                                                                               | 0.0873                                                                               | 0.1043                                                                               |
| wR <sub>2</sub> (All data) <sup>b</sup> | 0.2517                                                                               | 0.3184                                                                               | 0.2611                                                                               | 0.3065                                                                               |

<sup>a</sup>  $R_1 = \sum ||F_o| - |F_c|| / \sum |F_o|$    <sup>b</sup>  $wR_2 = \{\sum [w(F_o^2 - F_c^2)^2] / \sum [w(F_o^2)^2]\}^{1/2}$

**Table S2.** Selected bonds of **1**.

|          |           |          |          |
|----------|-----------|----------|----------|
| Co1-O142 | 2.063(9)  | Co4-O30  | 2.124(8) |
| Co1-O67  | 2.095(7)  | Co4-O18  | 2.141(7) |
| Co1-O45  | 2.107(6)  | Co4-O30W | 2.165(9) |
| Co1-O68  | 2.117(9)  | Co5-O55  | 2.031(6) |
| Co1-O47W | 2.164(10) | Co5-O167 | 2.062(7) |
| Co1-O89  | 2.190(7)  | Co5-O19  | 2.070(7) |
| Co2-O124 | 1.941(8)  | Co5-O98  | 2.082(6) |
| Co2-O60  | 2.047(8)  | Co5-O16  | 2.097(7) |
| Co2-O112 | 2.062(8)  | Co5-O168 | 2.133(9) |
| Co2-O31  | 2.091(7)  | Co6-O42  | 2.066(6) |
| Co2-O12  | 2.101(7)  | Co6-O164 | 2.086(7) |
| Co2-O74  | 2.123(7)  | Co6-O11  | 2.104(7) |
| Co3-O109 | 2.038(8)  | Co6-O21  | 2.111(7) |
| Co3-O61  | 2.054(7)  | Co6-O70W | 2.126(9) |
| Co3-O69  | 2.117(5)  | Co6-O101 | 2.127(7) |
| Co3-O28  | 2.130(6)  | Co7-O77  | 2.058(9) |
| Co3-O25  | 2.131(7)  | Co7-O103 | 2.069(7) |
| Co3-O127 | 2.135(8)  | Co7-O40  | 2.097(5) |
| Co4-O140 | 2.038(6)  | Co7-O43  | 2.099(7) |
| Co4-O46  | 2.055(6)  | Co7-O32  | 2.106(6) |
| Co4-O78  | 2.112(6)  | Co7-O92  | 2.107(7) |
| Gd1-O62  | 2.306(5)  | Gd9-O52  | 2.370(6) |
| Gd2-O62  | 2.341(5)  | Gd10-O82 | 2.440(6) |
| Gd3-O54  | 2.340(6)  | Gd11-O22 | 2.344(6) |
| Gd4-O54  | 2.410(5)  | Gd12-O64 | 2.314(6) |
| Gd5-O62  | 2.313(7)  | Gd13-O54 | 2.481(7) |
| Gd6-O64  | 2.337(6)  | Gd14-O84 | 2.399(6) |
| Gd7-O82  | 2.299(6)  | Gd15-O66 | 2.443(8) |
| Gd8-O64  | 2.417(6)  | Gd16-O48 | 2.344(5) |

**Table S3.** Selected bonds of **2**.

|          |           |           |           |
|----------|-----------|-----------|-----------|
| Ni1-O142 | 2.040(18) | Ni4-O78   | 2.139(12) |
| Ni1-O67  | 2.082(15) | Ni5-O168  | 1.974(19) |
| Ni1-O45  | 2.105(13) | Ni5-O167  | 2.021(15) |
| Ni1-O89  | 2.138(13) | Ni5-O16   | 2.056(14) |
| Ni1-O47W | 2.20(3)   | Ni5-O55   | 2.060(11) |
| Ni1-O68  | 2.198(15) | Ni5-O98   | 2.089(13) |
| Ni2-O112 | 1.93(3)   | Ni5-O19   | 2.125(14) |
| Ni2-O12  | 2.014(18) | Ni6-O164  | 2.076(17) |
| Ni2-O60  | 2.082(17) | Ni6-O101  | 2.079(15) |
| Ni2-O74  | 2.128(15) | Ni6-O21   | 2.090(16) |
| Ni2-O31  | 2.157(14) | Ni6-O11   | 2.094(13) |
| Ni2-Ni'  | 1.057(6)  | Ni6-O5W   | 2.116(19) |
| Ni3-O25  | 1.970(13) | Ni6-O42   | 2.140(11) |
| Ni3-O61  | 1.974(12) | Ni7-O40   | 2.029(11) |
| Ni3-O127 | 2.018(11) | Ni7-O32   | 2.029(13) |
| Ni3-O109 | 2.05(2)   | Ni7-O43   | 2.050(11) |
| Ni3-O69  | 2.143(14) | Ni7-O103  | 2.061(12) |
| Ni3-O28  | 2.154(14) | Ni7-O77   | 2.135(14) |
| Ni4-O140 | 2.006(14) | Ni7-O92   | 2.161(12) |
| Ni4-O46  | 2.020(11) | Ni''-O127 | 1.452(13) |
| Ni4-O30  | 2.040(15) | Ni''-O109 | 1.74(2)   |
| Ni4-O18  | 2.129(13) | Ni''-O69  | 2.229(14) |
| Ni4-O30W | 2.139(17) | Ni''-O28  | 2.247(15) |
| Gd1-O62  | 2.289(10) | Gd9-O52   | 2.288(13) |
| Gd2-O62  | 2.280(10) | Gd10-O83  | 2.384(14) |
| Gd3-O42  | 2.380(11) | Gd11-O44  | 2.417(12) |
| Gd4-O54  | 2.432(10) | Gd12-O64  | 2.271(11) |
| Gd5-O62  | 2.308(12) | Gd13-O54  | 2.437(12) |
| Gd6-O64  | 2.374(11) | Gd14-O49  | 2.453(13) |

**Table S4.** Selected bonds of **3**.

|          |           |          |           |
|----------|-----------|----------|-----------|
| Co1-O142 | 2.030(10) | Co4-O30  | 2.118(8)  |
| Co1-O45  | 2.049(8)  | Co4-O78  | 2.125(8)  |
| Co1-O68  | 2.071(9)  | Co4-O30W | 2.174(9)  |
| Co1-O89  | 2.124(9)  | Co5-O167 | 2.037(9)  |
| Co1-O67  | 2.143(9)  | Co5-O55  | 2.065(8)  |
| Co1-O47W | 2.181(10) | Co5-O168 | 2.078(9)  |
| Co2-O112 | 2.053(9)  | Co5-O19  | 2.084(7)  |
| Co2-O60  | 2.059(9)  | Co5-O98  | 2.085(8)  |
| Co2-O124 | 2.066(9)  | Co5-O16  | 2.117(9)  |
| Co2-O12  | 2.096(7)  | Co6-O164 | 2.056(9)  |
| Co2-O74  | 2.108(9)  | Co6-O42  | 2.074(9)  |
| Co2-O31  | 2.158(8)  | Co6-O11  | 2.109(8)  |
| Co3-O61  | 2.012(8)  | Co6-O101 | 2.133(9)  |
| Co3-O25  | 2.080(7)  | Co6-O5W  | 2.139(10) |
| Co3-O109 | 2.096(9)  | Co6-O21  | 2.148(9)  |
| Co3-O69  | 2.101(8)  | Co7-O32  | 2.051(7)  |
| Co3-O127 | 2.136(9)  | Co7-O40  | 2.055(6)  |
| Co3-O28  | 2.141(8)  | Co7-O103 | 2.074(8)  |
| Co4-O46  | 2.032(8)  | Co7-O43  | 2.076(8)  |
| Co4-O140 | 2.037(9)  | Co7-O92  | 2.078(9)  |
| Co4-O18  | 2.107(8)  | Co7-O77  | 2.094(9)  |
| Dy1-O62  | 2.284(7)  | Dy9-O52  | 2.287(8)  |
| Dy2-O62  | 2.297(7)  | Dy10-O82 | 2.396(8)  |
| Dy3-O42  | 2.317(8)  | Dy11-O44 | 2.406(7)  |
| Dy4-O54  | 2.424(8)  | Dy12-O84 | 2.301(8)  |
| Dy5-O62  | 2.353(8)  | Dy13-O44 | 2.321(8)  |
| Dy6-O64  | 2.292(7)  | Dy14-O84 | 2.392(8)  |
| Dy7-O82  | 2.272(8)  | Dy15-O66 | 2.392(8)  |
| Dy8-O64  | 2.414(7)  | Dy16-O48 | 2.309(8)  |

**Table S5.** Selected bonds of **4**.

|          |           |          |           |
|----------|-----------|----------|-----------|
| Ni1-O142 | 2.013(11) | Ni4-O30  | 2.077(9)  |
| Ni1-O45  | 2.017(8)  | Ni4-O18  | 2.118(8)  |
| Ni1-O68  | 2.036(9)  | Ni4-O30W | 2.118(11) |
| Ni1-67   | 2.055(8)  | Ni5-O124 | 1.995(10) |
| Ni1-O47W | 2.079(11) | Ni5-O112 | 2.031(9)  |
| Ni1-O89  | 2.094(9)  | Ni5-O12  | 2.047(8)  |
| Ni2-O55  | 2.019(7)  | Ni5-O60  | 2.052(8)  |
| Ni2-O167 | 2.030(8)  | Ni5-O31  | 2.082(8)  |
| Ni2-O168 | 2.032(10) | Ni5-O74  | 2.084(9)  |
| Ni2-O16  | 2.048(8)  | Ni6-O32  | 2.004(7)  |
| Ni2-O19  | 2.051(8)  | Ni6-O40  | 2.028(7)  |
| Ni2-O98  | 2.067(8)  | Ni6-O77  | 2.055(11) |
| Ni3-O61  | 2.014(9)  | Ni6-O92  | 2.059(9)  |
| Ni3-O109 | 2.029(9)  | Ni6-O43  | 2.059(9)  |
| Ni3-O25  | 2.061(8)  | Ni6-O103 | 2.090(8)  |
| Ni3-O127 | 2.068(11) | Ni7-O42  | 2.032(9)  |
| Ni3-O69  | 2.070(8)  | Ni7-O169 | 2.057(10) |
| Ni3-O28  | 2.099(8)  | Ni7-O11  | 2.061(9)  |
| Ni4-O46  | 2.003(8)  | Ni7-O164 | 2.077(10) |
| Ni4-O78  | 2.053(8)  | Ni7-O21  | 2.097(9)  |
| Ni4-O140 | 2.076(8)  | Ni7-O101 | 2.122(9)  |
| Dy1-O62  | 2.311(6)  | Dy9-O52  | 2.290(8)  |
| Dy2-O62  | 2.264(6)  | Dy10-O82 | 2.411(8)  |
| Dy3-O42  | 2.313(8)  | Dy11-O44 | 2.395(8)  |
| Dy4-O54  | 2.361(8)  | Dy12-O64 | 2.276(8)  |
| Dy5-O62  | 2.294(7)  | Dy13-O44 | 2.315(8)  |
| Dy6-O64  | 2.298(8)  | Dy14-O84 | 2.392(8)  |
| Dy7-O82  | 2.249(8)  | Dy15-O18 | 2.377(8)  |
| Dy8-O64  | 2.405(8)  | Dy16-O48 | 2.336(7)  |

**Table S5.** Bond valence sum (BVS) calculations for Co ions in **1** and **3**.

|     | <b>1</b> | <b>3</b> |
|-----|----------|----------|
| Co1 | 1.9269   | 2.0586   |
| Co2 | 2.2934   | 2.1009   |
| Co3 | 2.0426   | 2.0810   |
| Co4 | 2.0188   | 2.0607   |
| Co5 | 2.1610   | 2.1666   |
| Co6 | 2.0206   | 1.9906   |
| Co7 | 2.0977   | 2.2010   |

**Table S6.** Inductively Coupled Plasma Atomic Emission Spectrometer (ICP–AES) for **1-4**.

| Compounds | Ln : M  | Ratio |
|-----------|---------|-------|
| <b>1</b>  | Gd : Co | 6.3   |
| <b>2</b>  | Gd : Ni | 6.0   |
| <b>3</b>  | Dy : Co | 6.2   |
| <b>4</b>  | Dy : Ni | 6.1   |

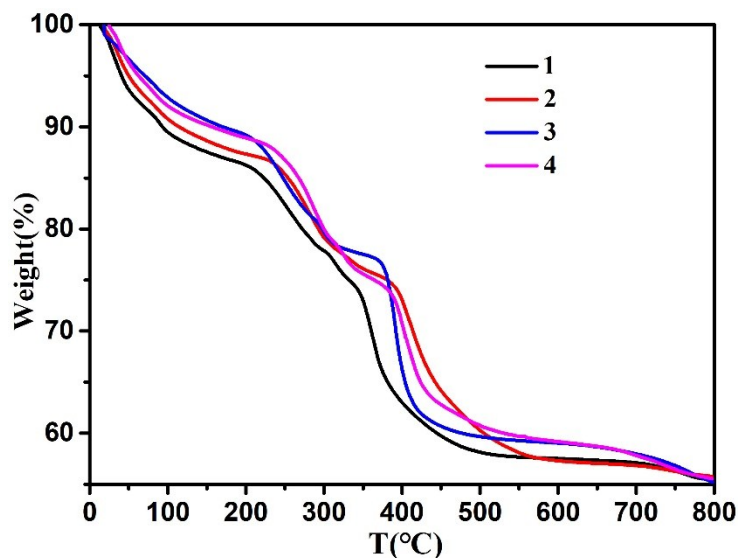

**Figure S1.** TG Curves for compounds **1-4**.

The TGA of compounds **1-4** were measured under atmosphere. As shown in Figure **S1**, the mass losses of **1-4** at about 210 °C are 13.8 %, 13.2 %, 12.1 % and 12.5 % respectively, which is close to the calculated value (13.3 – 13.5 %) to the removal of guest water molecular and coordination water molecular. When the temperature is higher than 220 °C, the metal frameworks of **1-4** are drastically collapsed. The final residues of **1-4** are about 55.6 %, which agree with calculated values (54.3 % – 55.4 %) based on  $\text{Ln}_2\text{O}_3$  ( $\text{Ln} = \text{Gd}$  and  $\text{Dy}$ ),  $\text{NiO}$  and  $\text{Co}_3\text{O}_4$ .

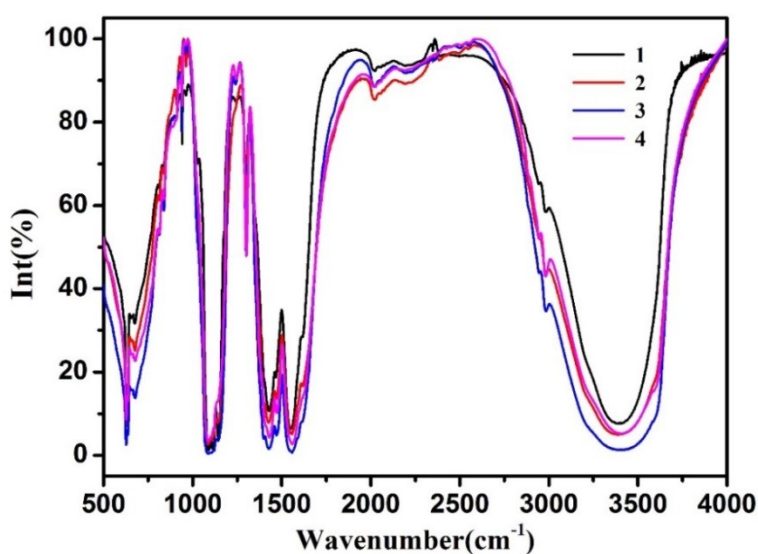

**Figure S2.** IR spectra in 500-4000  $\text{cm}^{-1}$  for compounds **1-4**.
